# Supplementary material
Source: PubMed Central journal article supplement (PMC4210101)
Supplement: embr0015-0529-sd2.pdf [file embr0015-0529-sd2.pdf]

## Supplemental Figure 2

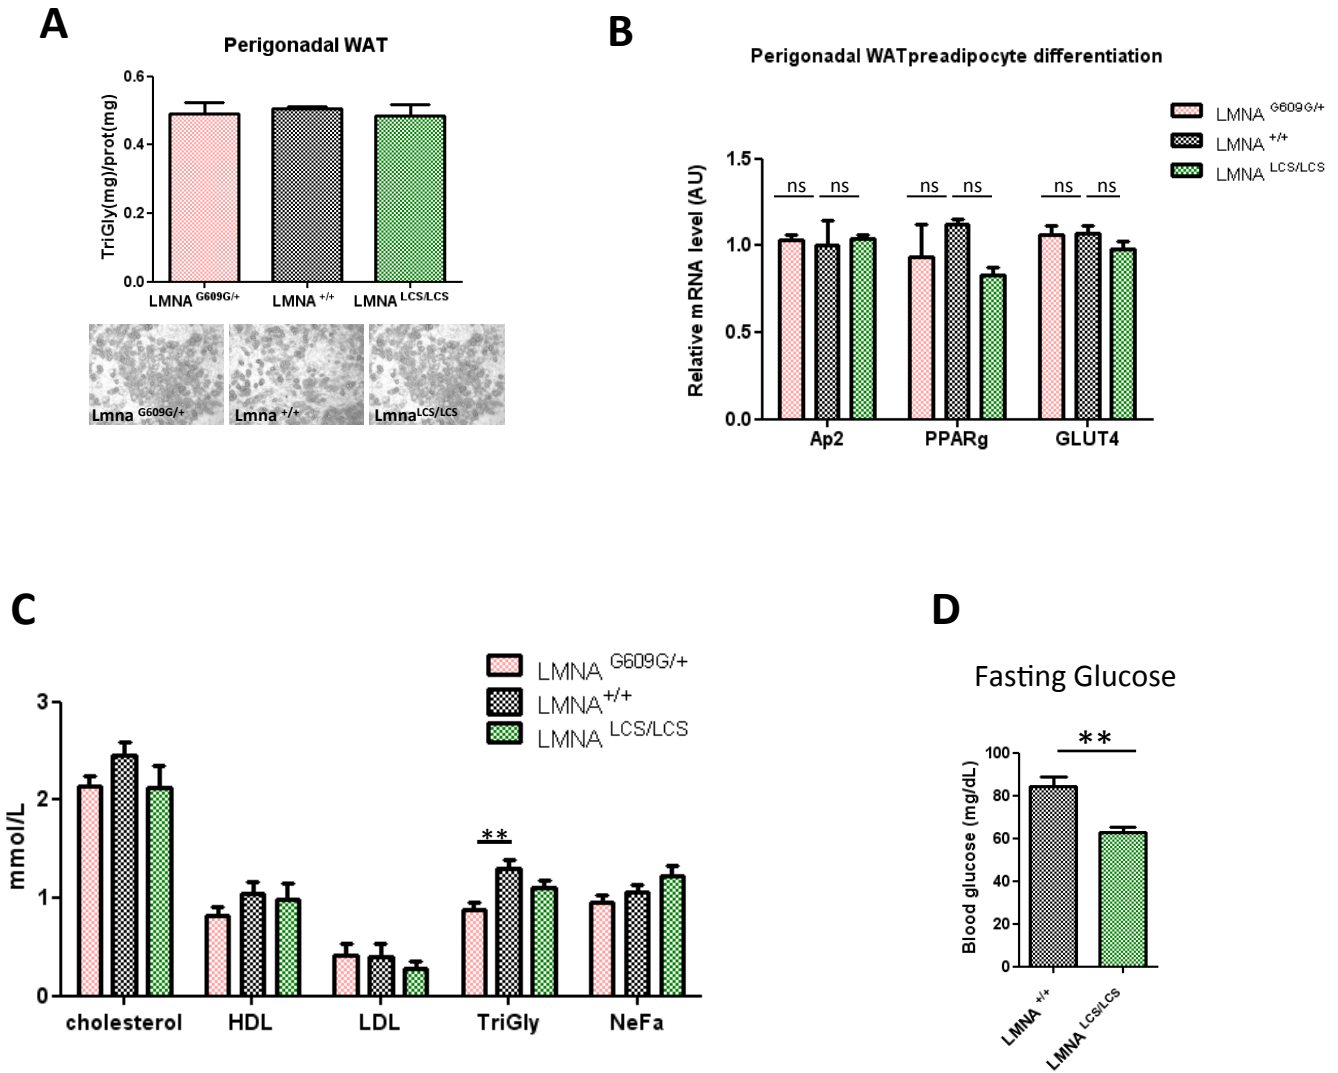

**Supplemental figure 2: Lamin isoforms have no effect on adipose tissue differentiation**

**A-** Triglycerides content in differentiated preadipocytes isolated from perigonadal WAT from 45-weeks-old *Lmna*<sup>+/+</sup>, *Lmna*<sup>G609G/+</sup> and *Lmna*<sup>LCS/LCS</sup> mice (n=3 per genotype). Representative photograph of the differentiated cells is shown in the lower panel.

**B-** Relative mRNA level of adipocyte markers after differentiation of preadipocytes isolated from perigonadal WAT from 45-weeks-old *Lmna*<sup>+/+</sup>, *Lmna*<sup>G609G/+</sup> and *Lmna*<sup>LCS/LCS</sup> mice (n= 3 per genotype).

**C-** Serum lipids profile in 40-weeks-old *Lmna*<sup>+/+</sup> (n=8), *Lmna*<sup>G609G/+</sup> (n=14) and *Lmna*<sup>LCS/LCS</sup> (n=9) mice.

**D-** fasted glucose level in 20 month-old *Lmna*<sup>+/+</sup> (n=5) and *Lmna*<sup>LCS/LCS</sup> (n=7) mice.

All results were expressed as means +/- S.E.M. The significance of differences was determined with the Student *t* test (\*p < 0.01, \*\*p < 0.001).
