# Supplementary material
Source: PubMed Central journal article supplement (PMC4210101)
Supplement: embr0015-0529-sd3.pdf [file embr0015-0529-sd3.pdf]

## Supplemental Figure 3

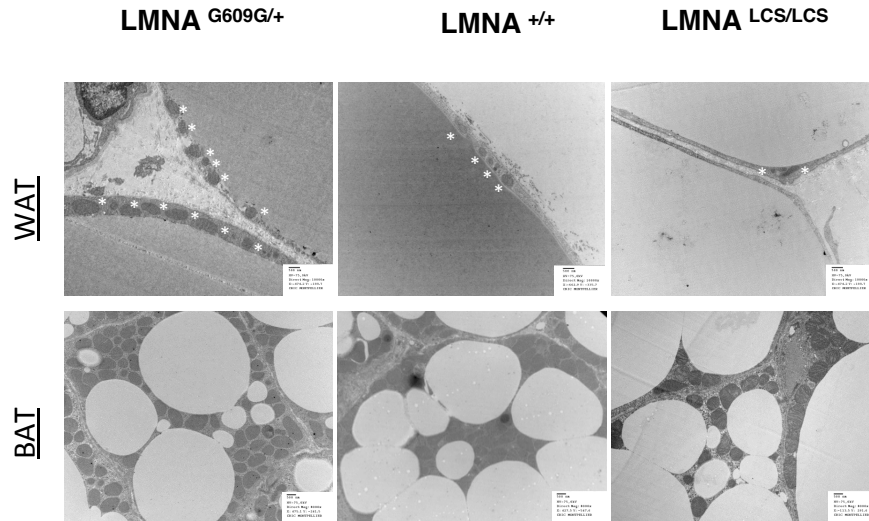

### Supplemental figure 3:

A- Representative electron microscopy images of mitochondria in WAT and BAT of different genotype.
