# Supplementary material
Source: PubMed Central journal article supplement (PMC4210101)
Supplement: embr0015-0529-sd4.pdf [file embr0015-0529-sd4.pdf]

## Supplemental figure 4A

| Gene     | Protein                                                                 | G609G/G609G vs +/- |             |          | Function                                                                                                                                                                                                                                                             |
|----------|-------------------------------------------------------------------------|--------------------|-------------|----------|----------------------------------------------------------------------------------------------------------------------------------------------------------------------------------------------------------------------------------------------------------------------|
|          |                                                                         | Reg.               | Fold change | P-value  |                                                                                                                                                                                                                                                                      |
| Adipoq   | Adiponectin                                                             | up                 | 6.1539      | 0.0374   | Adiponectin is a protein hormone that modulates glucose metabolism and fatty acid oxidation                                                                                                                                                                          |
| Cdkn1a   | p21                                                                     | up                 | 14.2264     | 0.032219 | p21 is a cyclin-dependent kinase inhibitor (CKI) that inhibits the activity of cyclin-CDK2 or -CDK1 complexes, and thus functions as a regulator of cell cycle progression at G1 phase                                                                               |
| Cfd      | Adipsin                                                                 | Up                 | 3.7425      | 0,018678 | Adipsin (which in human subjects corresponds to complement factor D46) is the rate-limiting enzyme in the alternative pathway of complement activation.                                                                                                              |
| Dio2     | Deiodinase, Iodothyronine, type II                                      | Up                 | 4,6751      | 0,003692 | It activates thyroid hormone by converting the prohormone thyroxine (T4) by outer ring deiodination (ORD) to bioactive 3,3',5'-triiodothyronine (T3)                                                                                                                 |
| Klf15    | Kruppel-like factor 15                                                  | up                 | 11.2785     | 0.01178  | KLF15 plays an essential role in adipogenesis in 3T3-L1 cells through its regulation of PPAR gamma expression                                                                                                                                                        |
| Klf4     | Kruppel-like factor 4                                                   | up                 | 2.584       | 0.037216 | Klf4 is important in regulating pluripotency and adipocyte differentiation                                                                                                                                                                                           |
| Pparg    | peroxisome proliferator activated receptor gamma                        | up                 | 2.166       | 0.055952 | PPAR gamma regulates fatty acid storage and glucose metabolism.                                                                                                                                                                                                      |
| Ppargc1a | peroxisome proliferative activated receptor, gamma, coactivator 1 alpha | up                 | 5.15533     | 0.0936   | Transcription coactivator that plays a central role in the regulation of cellular energy metabolism                                                                                                                                                                  |
| Ppargc1b | peroxisome proliferative activated receptor, gamma, coactivator 1 beta  | up                 | 1.8372      | 0.084945 | Transcription coregulator that plays a role in fat oxidation, in non-oxidative glucose metabolism, and in the regulation of energy expenditure.                                                                                                                      |
| Sirt1    | Sirtuin 1                                                               | up                 | 2.476       | 0.005788 | NAD-dependent protein deacetylase that links transcriptional regulation directly to intracellular energetics and participates in cell cycle, metabolism, apoptosis and autophagy                                                                                     |
| Slc2a4   | Solute carrier family 2, member 4 (GLUT4)                               | up                 | 2.24        | 0.059194 | Protein that unctions as an insulin-regulated facilitative glucose transporter                                                                                                                                                                                       |
| Tsc22d3  | TSC22 domain family, member 3                                           | up                 | 6.3401      | 0.048788 | Transcriptional regulator that plays a key role in the anti-inflammatory and immunosuppressive effects of this steroid and chemokine                                                                                                                                 |
| Lep      | Leptin                                                                  | down               | 43.0368     | 0.03325  | Leptin plays a key role in regulating energy intake and energy expenditure, including appetite/hunger and metabolism                                                                                                                                                 |
| Sfrp5    | secreted frizzled-related sequence protein 5                            | down               | 17.0063     | 0.19608  | Sfrp5 is an anti-inflammatory adipokine that modulates metabolic dysfunction in obesity                                                                                                                                                                              |
| Wnt10b   | Wingless related MMTV integration site 10b                              | down               | 4,9674      | 0,001923 | The WNT gene family consists of structurally related genes that encode secreted signaling proteins. These proteins have been implicated in oncogenesis and in several developmental processes, including regulation of cell fate and patterning during embryogenesis |

| Gene     | Protein                                                                 | LCS/LCS vs +/- |             |          | Function                                                                                                             |
|----------|-------------------------------------------------------------------------|----------------|-------------|----------|----------------------------------------------------------------------------------------------------------------------|
|          |                                                                         | Reg.           | Fold change | P-value  |                                                                                                                      |
| E2f1     | E2F transcription factor 1                                              | up             | 1.795       | 0.221001 | Transcription factor that plays a role in the control of cell cycle and action of tumor suppressor proteins          |
| Lep      | Leptin                                                                  | up             | 6.9131      | 0.034099 | Leptin plays a key role in regulating energy intake and energy expenditure, including appetite/hunger and metabolism |
| Sfrp5    | secreted frizzled-related sequence protein 5                            | up             | 9.3697      | 0.093636 | Sfrp5 is an anti-inflammatory adipokine that modulates metabolic dysfunction in obesity                              |
| Ppara    | peroxisome proliferator activated receptor alpha                        | down           | 1.6533      | 0.063465 | PPARalpha regulates fatty acid synthesis and oxidation, gluconeogenesis, ketogenesis and lipoprotein assembly        |
| Ppargc1a | peroxisome proliferative activated receptor, gamma, coactivator 1 alpha | down           | 1.8268      | 0.040326 | Transcription coactivator that plays a central role in the regulation of cellular energy metabolism                  |

## Supplemental figure 4B

| Gene    | Protein                                                                                                                               | G609G/G609G vs +/- |             |          | Function                                                                                                                                                                                                                                                         |
|---------|---------------------------------------------------------------------------------------------------------------------------------------|--------------------|-------------|----------|------------------------------------------------------------------------------------------------------------------------------------------------------------------------------------------------------------------------------------------------------------------|
|         |                                                                                                                                       | Reg.               | Fold change | P-value  |                                                                                                                                                                                                                                                                  |
| Acaa1a  | Acetyl-Coenzyme A acyltransferase 1A                                                                                                  | up                 | 1.6239      | 0.011172 | This gene encodes an enzyme operative in the beta-oxidation system of the peroxisomes                                                                                                                                                                            |
| Acad10  | Acyl-Coenzyme A dehydrogenase family, member 10                                                                                       | up                 | 1.8474      | 0.028319 | Acyl-CoA dehydrogenase participates in the beta-oxidation of fatty acids in mitochondria. Acyl-CoA dehydrogenase only active with R- and S-2-methyl-C15-CoA                                                                                                      |
| Acadl   | Acyl-Coenzyme A dehydrogenase, long-chain                                                                                             | up                 | 2.2784      | 0.045664 | This protein is one of the four enzymes that catalyze the initial step of mitochondrial beta-oxidation of straight-chain fatty acid                                                                                                                              |
| Acadsb  | Acyl-Coenzyme A dehydrogenase, short/branched chain                                                                                   | up                 | 1.8712      | 0.01275  | Short/branched chain acyl-CoA dehydrogenase catalyzes the dehydrogenation of acyl-CoA derivatives in the metabolism of fatty acids or branch chained amino acids                                                                                                 |
| Acadvl  | Acyl-Coenzyme A dehydrogenase, very long chain                                                                                        | up                 | 2.4436      | 0.041491 | The protein is targeted to the inner mitochondrial membrane where it catalyzes the first step of the mitochondrial fatty acid beta-oxidation pathway. This acyl-Coenzyme A dehydrogenase is specific to long-chain and very-long-chain fatty acids               |
| Acat1   | Acetyl-Coenzyme A acetyltransferase 1                                                                                                 | up                 | 1.8245      | 0.057322 | a mitochondrially localized enzyme that catalyzes the reversible formation of acetoacetyl-CoA from two molecules of acetyl-CoA                                                                                                                                   |
| Acot3   | Acyl-CoA thioesterase 3                                                                                                               | up                 | 3.4474      | 0.04137  | Acyl-CoA thioesterases catalyze the hydrolysis of acyl-CoAs to the free fatty acid and coenzyme A (CoASH), providing the potential to regulate intracellular levels of acyl-CoAs, free fatty acids and CoASH                                                     |
| Acot6   | Acyl-CoA thioesterase 6                                                                                                               | up                 | 1.6245      | 0.021967 | Acyl-CoA thioesterases catalyze the hydrolysis of acyl-CoAs to the free fatty acid and coenzyme A (CoASH), providing the potential to regulate intracellular levels of acyl-CoAs, free fatty acids and CoASH                                                     |
| Acot8   | Acyl-CoA thioesterase 8                                                                                                               | up                 | 1.9622      | 0.039177 | Acyl-CoA thioesterases catalyze the hydrolysis of acyl-CoAs to the free fatty acid and coenzyme A (CoASH), providing the potential to regulate intracellular levels of acyl-CoAs, free fatty acids and CoASH                                                     |
| Acox1   | Acyl-Coenzyme A oxidase 1, palmitoyl                                                                                                  | up                 | 1.7994      | 0.072648 | This protein is the first enzyme of the fatty acid beta-oxidation pathway, which catalyzes the desaturation of acyl-CoAs to 2-trans-enoyl-CoAs                                                                                                                   |
| Acsm3   | Acyl-CoA synthetase medium-chain family member 3                                                                                      | up                 | 4.1482      | 0.0144   | This protein has medium-chain fatty acid:CoA ligase activity with broad substrate specificity (in vitro). Acts on acids from C(4) to C(11) and on the corresponding 3-hydroxy- and 2,3- or 3,4-unsaturated acids (in vitro)                                      |
| Aldh2   | Aldehyde dehydrogenase 2, mitochondrial                                                                                               | up                 | 1.7153      | 0.097939 | Aldehyde dehydrogenase is the second enzyme of the major oxidative pathway of alcohol metabolism                                                                                                                                                                 |
| Bdh2    | 3-hydroxybutyrate dehydrogenase, type 2                                                                                               | up                 | 1.8207      | 0.02479  | Dehydrogenase that mediates the formation of 2,5-dihydroxybenzoic acid (2,5-DHBA), a siderophore that shares structural similarities with bacterial enterobactin and associates with LCN2, thereby playing a key role in iron homeostasis and transport          |
| Crat    | Carnitine acetyltransferase                                                                                                           | up                 | 1.5508      | 0.212862 | Key enzyme in the metabolic pathway in mitochondria, peroxisomes and endoplasmic reticulum. CRAT catalyzes the reversible transfer of acyl groups from an acyl-CoA thioester to carnitine and regulates the ratio of acylCoA/CoA in the subcellular compartments |
| Echs1   | Enoyl Coenzyme A hydratase, short chain, 1, mitochondrial                                                                             | up                 | 2.1214      | 0.042878 | In the second step of the mitochondrial fatty acid beta-oxidation pathway, this enzyme catalyzes the hydration of 2-trans-enoyl-coenzyme A (CoA) intermediates to L-3-hydroxyacyl-CoAs                                                                           |
| Ehadh   | Enoyl-Coenzyme A, hydratase/3-hydroxyacyl Coenzyme A dehydrogenase                                                                    | up                 | 8.5209      | 0.178875 | The protein encoded by this gene is a bifunctional enzyme and is one of the four enzymes of the peroxisomal beta-oxidation pathway.                                                                                                                              |
| Gpd2    | Glycerol phosphate dehydrogenase 2, mitochondrial                                                                                     | up                 | 1.6403      | 0.261949 | Localized to the inner mitochondrial membrane, it catalyzes the conversion of glycerol-3-phosphate to dihydroxyacetone phosphate, using FAD as a cofactor                                                                                                        |
| Hadha   | Hydroxyacyl-Coenzyme A dehydrogenase/3-ketoacyl-Coenzyme A thiolase/enoyl-Coenzyme A hydratase (trifunctional protein), alpha subunit | up                 | 1.5476      | 0.059643 | 3-hydroxy-3-methylglutaryl-Coenzyme A synthase 2                                                                                                                                                                                                                 |
| Hmgcl   | 3-hydroxy-3-methylglutaryl-Coenzyme A lyase                                                                                           | up                 | 2.3867      | 0.010183 | It is a mitochondrial enzyme that catalyzes the final step of leucine degradation and plays a key role in ketone body formation                                                                                                                                  |
| Hmgcs2  | 3-hydroxy-3-methylglutaryl-Coenzyme A synthase 2                                                                                      | up                 | 1.7381      | 0.079947 | It is a mitochondrial enzyme that catalyzes the first reaction of ketogenesis, a metabolic pathway that provides lipid-derived energy for various organs during times of carbohydrate deprivation, such as fasting                                               |
| Mut     | Methylmalonyl-Coenzyme A mutase                                                                                                       | up                 | 1.6958      | 0.038346 | This enzyme is involved in the degradation of several amino acids, odd-chain fatty acids and cholesterol via propionyl-CoA to the tricarboxylic acid cycle                                                                                                       |
| Eci2    | Enoyl-Coenzyme A delta isomerase 2                                                                                                    | up                 | 1.6604      | 0.004512 | The protein encoded is a key mitochondrial enzyme involved in beta-oxidation of unsaturated fatty acids                                                                                                                                                          |
| Ppa1    | Pyrophosphatase (inorganic) 1                                                                                                         | up                 | 2.5324      | 0.041807 | The pyrophosphatases catalyze the hydrolysis of pyrophosphate to inorganic phosphate, which is important for the phosphate metabolism of cells                                                                                                                   |
| Prkaa2  | Protein kinase, AMP-activated, alpha 2 catalytic subunit                                                                              | up                 | 2.2061      | 0.019624 | The protein encoded by this gene is a catalytic subunit of the AMP-activated protein kinase (AMPK). AMPK is an important energy-sensing enzyme that monitors cellular energy status                                                                              |
| Prkab1  | Protein kinase, AMP-activated, beta 1 non-catalytic subunit                                                                           | up                 | 1.554       | 0.143722 | The protein encoded by this gene is a regulatory subunit of the AMP-activated protein kinase (AMPK). AMPK is an important energy-sensing enzyme that monitors cellular energy status                                                                             |
| Prkab2  | Protein kinase, AMP-activated, beta 2 non-catalytic subunit                                                                           | up                 | 3.4762      | 0.037142 | The protein encoded by this gene is a regulatory subunit of the AMP-activated protein kinase (AMPK). AMPK is an important energy-sensing enzyme that monitors cellular energy status                                                                             |
| Prkacb  | Protein kinase, cAMP dependent, catalytic, beta                                                                                       | up                 | 1.5006      | 0.04372  | The protein encoded by this gene is a member of the Ser/Thr protein kinase family and is a catalytic subunit of cAMP-dependent protein kinase                                                                                                                    |
| Prkag1  | Protein kinase, AMP-activated, gamma 1 non-catalytic subunit                                                                          | up                 | 2.4743      | 0.00011  | The protein encoded by this gene is a regulatory subunit of the AMP-activated protein kinase (AMPK). AMPK is an important energy-sensing enzyme that monitors cellular energy status                                                                             |
| Slc27a1 | Solute carrier family 27 (fatty acid transporter), member 1                                                                           | up                 | 3.5913      | 0.022578 | Involved in translocation of long-chain fatty acids (LFCA) across the plasma membrane. Plays a pivotal role in regulating available LFCA substrates from exogenous sources in tissues undergoing high levels of beta-oxidation or triglyceride synthesis         |
| Acad11  | Acyl-Coenzyme A dehydrogenase family, member 11                                                                                       | down               | 1.5562      | 0.226555 | Acyl-CoA dehydrogenase participates in the beta-oxidation of fatty acids in mitochondria. Its exhibits maximal activity towards saturated C22-CoA                                                                                                                |
| Acsbg1  | Acyl-CoA synthetase bubblegum family member 1                                                                                         | down               | 3.0951      | 0.062566 | Mediates activation of long-chain fatty acids for both synthesis of cellular lipids, and degradation via beta-oxidation. Able to activate long-chain fatty acids and very long-chain fatty acids                                                                 |
| Acs16   | Acyl-CoA synthetase long-chain family member 6                                                                                        | down               | 4.4862      | 0.269089 | This enzyme catalyzes the formation of acyl-CoA from fatty acids, ATP, and CoA, using magnesium as a cofactor and plays a major role in fatty acid metabolism in the brain                                                                                       |
| Bdh1    | 3-hydroxybutyrate dehydrogenase, type 1                                                                                               | down               | 2.151       | 0.255326 | This enzyme catalyzes the interconversion of acetoacetate and (R)-3-hydroxybutyrate, the two major ketone bodies produced during fatty acid catabolism                                                                                                           |
| Cpt1a   | Carnitine palmitoyltransferase 1a, liver                                                                                              | down               | 1.5654      | 0.098422 | CPT1 is the key enzyme in the carnitine-dependent transport across the mitochondrial inner membrane and its deficiency results in a decreased rate of fatty acid beta-oxidation                                                                                  |
| Fabp1   | Fatty acid binding protein 1, liver                                                                                                   | down               | 3.2009      | 0.274616 | FABPs bind long-chain fatty acids and other hydrophobic ligands. FABPs roles include fatty acid uptake, transport, and metabolism                                                                                                                                |
| Fabp5   | Fatty acid binding protein 5, epidermal                                                                                               | down               | 4.0014      | 0.054228 | FABPs bind long-chain fatty acids and other hydrophobic ligands. FABPs roles include fatty acid uptake, transport, and metabolism                                                                                                                                |
| Slc27a6 | Solute carrier family 27 (fatty acid transporter), member 6                                                                           | down               | 2.2736      | 0.260342 | This gene encodes a member of the fatty acid transport protein family (FATP). FATPs are involved in the uptake of long-chain fatty acids and have unique expression patterns                                                                                     |

| Gene    | Protein                                                      | LCS/LCS vs +/- |             |          | Function                                                                                                                                                                                                                                                   |
|---------|--------------------------------------------------------------|----------------|-------------|----------|------------------------------------------------------------------------------------------------------------------------------------------------------------------------------------------------------------------------------------------------------------|
|         |                                                              | Reg.           | Fold change | P-value  |                                                                                                                                                                                                                                                            |
| Prkag3  | Protein kinase, AMP-activated, gamma 3 non-catalytic subunit | up             | 3.4426      | 0.080789 | The protein encoded by this gene is a regulatory subunit of the AMP-activated protein kinase (AMPK). AMPK is an important energy-sensing enzyme that monitors cellular energy status                                                                       |
| Actb    | Actin, beta                                                  | up             | 1.7977      | 0.013061 | Actin is a ubiquitous globular protein that is one of the most highly-conserved proteins known                                                                                                                                                             |
| Acot3   | Acyl-CoA thioesterase 3                                      | down           | 5.1024      | 0.048218 | Acyl-CoA thioesterases catalyze the hydrolysis of acyl-CoAs to the free fatty acid and coenzyme A (CoASH), providing the potential to regulate intracellular levels of acyl-CoAs, free fatty acids and CoASH                                               |
| Acot12  | Acyl-CoA thioesterase 12                                     | down           | 4.5689      | 0.163558 | Hydrolyzes acetyl-CoA to acetate and CoA                                                                                                                                                                                                                   |
| Acox2   | Acyl-Coenzyme A oxidase 2, branched chain                    | down           | 1.7122      | 0.137832 | The product of this gene belongs to the acyl-CoA oxidase family. It encodes the branched-chain acyl-CoA oxidase which is involved in the degradation of long branched fatty acids and bile acid intermediates in peroxisomes                               |
| Acsbg1  | Acyl-CoA synthetase bubblegum family member 1                | down           | 3.9427      | 0.166871 | Mediates activation of long-chain fatty acids for both synthesis of cellular lipids, and degradation via beta-oxidation. Able to activate long-chain fatty acids and very long-chain fatty acids                                                           |
| Acsm3   | Acyl-CoA synthetase medium-chain family member 3             | down           | 2.0297      | 0.051595 | This protein has medium-chain fatty acid:CoA ligase activity with broad substrate specificity. Acts on acids from C(4) to C(11) and on the corresponding 3-hydroxy- and 2,3- or 3,4-unsaturated acids                                                      |
| Bdh2    | 3-hydroxybutyrate dehydrogenase, type 2                      | down           | 1.588       | 0.067937 | Dehydrogenase that mediates the formation of 2,5-dihydroxybenzoic acid (2,5-DHBA), a siderophore that shares structural similarities with bacterial enterobactin and associates with LCN2, thereby playing a key role in iron homeostasis and transport    |
| Crot    | Carnitine O-octanoyltransferase                              | down           | 1.8182      | 0.296008 | This gene encodes a member of the carnitine/choline acetyltransferase family. The encoded protein converts 4,8-dimethylnonanoyl-CoA to its corresponding carnitine ester. The protein plays a role in lipid metabolism and fatty acid beta-oxidation       |
| Slc27a2 | Solute carrier family 27 (fatty acid transporter), member 2  | down           | 8.2354      | 0.217738 | The protein encoded by this gene is an isoform of long-chain fatty-acid-coenzyme A ligase family. This enzyme convert free long-chain fatty acids into fatty acyl-CoA esters, and thereby play a key role in lipid biosynthesis and fatty acid degradation |

#### **Supplemental figure 4:**

**A-** The Mouse Adipogenesis RT<sup>2</sup> Profiler™ PCR Array profiles the expression of 84 key genes involved in the differentiation and maintenance of mature adipocytes.

**B-** The Mouse Fatty Acid Metabolism RT<sup>2</sup> Profiler™ PCR Array profiles the expression of 84 key genes involved in the regulation and enzymatic pathways of fatty acid metabolism. Up-regulated genes appear in red, and down-regulated genes appear in green.

RNA samples were extracted from the adipose tissues of 4-month-old male *Lmna*<sup>G609G/G609G</sup> and *Lmna*<sup>LCS/LCS</sup> mice. (Five mice of each genotype were analyzed independently).
