# Supplementary material
Source: PubMed Central journal article supplement (PMC4210101)
Supplement: embr0015-0529-sd5.pdf [file embr0015-0529-sd5.pdf]

| RT qPCR primers |                                  |
|-----------------|----------------------------------|
| Mm PGC1 alpha F | 5'-CCGATCACCATATTCCAGGTC-3'      |
| Mm PGC1 alpha R | 5'-GTGTGCGGTGTCTGTAGTGG-3'       |
| Mm UCP1 F       | 5'-CACCTTCCCGCTGGACTGC-3'        |
| Mm UCP1 R       | 5'-TTGCCAGGGTGGTGTGTCC-3'        |
| Tfam F          | 5'-GCTCTACACGCCCTGGTTTCTGG-3'    |
| Tfam R          | 5'-TCGCTGTAGTGCCTGCTCCTG-3'      |
| mCAD F          | 5'-GATCGCAATGGGTGCTTTTGATAGAA-3' |
| mCAD R          | 5'-AGCTGATTGGCAATGTCTCCAGCAA-3'  |
| ATP synthase F  | 5'-GCCCGGGTAGCTCTGACTGGTTTG-3'   |
| ATP synthase R  | 5'-GTCGGTGGCTAGGGTGGGCTGGTA-3'   |
| NADH DHase F    | 5'-TTCCTCTGGATTCACCCTCA-3'       |
| NADH DHase R    | 5'-CATGAGGAGCGGAGTATT-3'         |
| CytC oxydase F  | 5'-ACCACAGCACTGGTTTTGGA-3'       |
| CytC oxydase R  | 5'-TAATGGTTCGCCATCTGAGGA-3'      |
| SDHA F          | GAAAGGCGGGCAGGCTCATC             |
| SDHA R          | CACCACGGCACTCCCCATTTT            |
| CPT2 F          | 5'-GGCCAGGGCTTTGACCGACT-3'       |
| CPT2 R          | 5'-TGCCAAAGCCATCAGGGACCAC-3'     |
| NRF1 F          | CCCCGAGGACTTCTTATGATG            |
| NRF1 R          | GGCCGTTTCCGTTTCTCCCTGTT          |
| NRF2 F          | 5'-CCGCTACACCGACTACGATT-3'       |
| NRF2 R          | 5'-ACCTTCATACCAACCAAG-3'         |
| SOD2 F          | ATCTGTAAGCGACCTTGCTC             |
| SOD2 R          | GCCTGCACTGAAGTTCAATG             |

| Mitochondrial DNA |                             |
|-------------------|-----------------------------|
| mND5              | 5'-GGCAGACGAACAAGACATCCG-3' |
| mND5              | 5'-GCTAGGCGTTTGATTGGGTT-3'  |
| m16s F            | 5'-CCGCAAGGGAAAGATGAAAGA-3' |
| m16s R            | 5'-TCGTTTGGTTTCGGGGTTTC-3'  |
| LN11 F            | 5'-TGGCAGGCAGCTTGGTAGTC-3'  |
| LN11 R            | 5'-AATGGCTGGGACAGAGCAGC-3'  |
| mHK2              | 5'-GCCAGCCTCTCCTGATTTAG-3'  |
| mHK2              | 5'-GGGAACACAAAAGACCTCTTC-3' |

Supplemental table of primers used to perform RT qPCR analysis presented in figure 4 and 5
